# Supplementary material
Source: PubMed Central journal article supplement (PMC3171732)
Supplement: NIHMS314303-supplement-1_si_001.pdf [file NIHMS314303-supplement-1_si_001.pdf]

## SUPPORTING INFORMATION

# A Three-Channel Spectrometer for Wide-Field Imaging of Anisotropic Plasmonic Nanoparticles

*Christina M. Sweeney,<sup>†,§</sup> Colleen L. Nehl,<sup>†,§</sup> Warefta Hasan,<sup>†</sup> Taiyang Liang,<sup>†</sup> Amanda Eckermann,<sup>†</sup>  
Thomas J. Meade,<sup>†</sup> and Teri W. Odom<sup>†,‡,\*</sup>*

*§ - Co-first Authors*

<sup>†</sup>Department of Chemistry, <sup>‡</sup>Department of Materials Science and Engineering, Northwestern  
University, 2145 Sheridan Road, Evanston, Illinois 60208-3113

\* To whom correspondence should be addressed. E-mail: [todom@northwestern.edu](mailto:todom@northwestern.edu).

Telephone number: 847-491-7674

Fax number: 847-497-7713

Email address: [todom@northwestern.edu](mailto:todom@northwestern.edu)

## Data Analysis of DF Scattering Spots

Tristimulus theory, which uses the summation of three colors with variable intensities to replicate most visible colors, is the basis by which digital cameras interpret color using the Bayer filter. The Bayer filter is composed of regions that are sensitive to specific wavelengths of light that roughly correspond to R, G, and B regions of the visible spectrum. By placing this filter over the CCD of a digital camera, the camera can interpret color because it only permits colors of certain wavelengths to impinge on the CCD in specific areas. The camera is programmed to demosaic, or average, neighboring RGB intensity values to simulate the color of the object. Using these ideas for 3CS, a MATLAB algorithm was composed to extract the average RGB values from each scattering spot in a dark-field optical image of metal NPs. As shown in the screen captures of the annotated code (Fig. S1), the RGB values for each particle can be determined, and then the algorithm can be used to determine particle characteristics based a predetermined metric value. The code in Fig. S1 was designed to distinguish between tip-up (U) from tip-down (D) nanopylramids.

Part 1 describes how the image (tiff format) was accessed in its file directory and how a region of interest in the image was selected for analysis. Included in this part of the code was a separation of the RGB layers of the tiff image. Part 2 demonstrates how the program distinguished bright spots from the background. Here, a gray scale version of the image was used to select spots brighter than a variable threshold value. Part 3 describes how bright areas above the threshold were identified as particles based on the symmetry of the bright spot. Once the bright spot was established as a particle, the RGB values were extracted and summed. Part 4 finds the average RGB value for each spot and then compared the values to the metric value determined from the calibration. Here, R/G values above 3.2 were assigned as U and below as D. Part 5 displays the data as histograms and on the image itself. The histograms were particularly useful for determining the differentiation scheme during calibration.

```

1 %%Code outline:
2 % 1. Opens file, names experiment and defines region of interest (ROI)
3 % 2. Locates particles
4 % 3. Excludes non-circular particles and sums RGB values for remaining
5 % particles.
6 % 4. Computes averaged values of R,G,B, and inputs metric valuation for
7 % differentiation.
8 % 5. Histograms of R,G,B, and the metric.
9
10 clear
11 all=[0 0 0]; %Clears stored values, defines initial values for variables
12 area=0;
13 Pl=[0 0 0];
14 z=[0];
15 numU=0;
16 numD=0;
17
18 %Part 1
19 name = input ('Enter name of file to analyze: ','s'); %Prints to command line prompt for file name
20 expname = input ('Enter name of experiment: ','s'); %Prints to command line prompt for experiment name
21 Pic1New = imread (strcat ('C:\Users\Odom Group\Desktop\matlabsimulateddata\', name), 'tiff'); %Opens file/stores
22 ynnum=str2num(expname); %Changes yn from a string to a number.
23 figure, imshow (Pic1New) %Shows the figure in a window
24 scrsz = get(0,'ScreenSize'); %Determines size of your monitor screen (useful for displaying images later).
25 figure, imshow (Pic1New) %Shows picture
26 masklog=roipoly; %Opens the ROIpoly function
27 mask = uint8 (masklog); %Converts mask data to unsigned 8 bit integers.
28 maskRGB = cat(3, mask, mask, mask ); %Creates a RGB version of the BW mask by stacking three levels.
29 masksavename= strcat (name, '_', 'mask', '_', expname); %mask save name is name_mask_expname.
30 imwrite (maskRGB, masksavename, 'tiff'); %Saves maskRGB as masksavename.
31 Pic1=(maskRGB.*Pic1New); %Applies the new mask to the picture.
32 imshow (Pic1); %Shows the picture with the new mask.
33
34 %Part 2
35
36 grayPic = rgb2gray(Pic1); %Creates grayscale version of picture.
37 figure, imshow (grayPic) %Displays grayscale version of the picture.
38 hold on
39 bw=imextendedmax(grayPic,8); %Select brightness here, larger values exclude dim particles
40 figure, imshow(bw);
41
42 [B,L] = bwboundaries(bw,'noholes'); %Traces the exterior boundaries of objects, converts to black and white.
43 imshow(label2rgb(L, @jet, [.5 .5 .5])) %Shows the boundary-traced object with the jet color scale.
44 imshow (Pic1) %Shows the original picture on top of the boundary-traced object.
45
46 hold on
47
48 %Code below plots boundary around pyramids
49 for k = 1:length(B) %for the first boundary (object) to the last object
50     boundary = B{k}; %boundary
51     plot(boundary(:,2), boundary(:,1), 'w', 'LineWidth', 0.1) %plots a boundary around the object (traces border)
52 end
53 stats = regionprops(L,'Area','Centroid'); %Finds the area and centroid for every object
54 area; %dummy
55 threshold = 0.6; %sets threshold for how circular particles should be
56 % loop over the boundaries
57 figure ('name', 'With labels') % displays the figure with labels
58 imshow (Pic1New) %shows the picture
59 hold on
60
61 %Part 3. Part 4 is a loop inside part 3.
62 for k = 1:length(B) %for every object from 1 to the last one
63     boundary = B{k}; %boundary
64     delta_sq = diff(boundary).^2; %Finds difference between adajacent elements of boundary
65     perimeter = sum(sqrt(sum(delta_sq,2))); %finds perimeter
66     area = stats(k).Area; %Determines area
67     metric = 4*pi*area/(perimeter^2); %NOT the ID metric for up vs down, for determination of circularity

```

```

67 metric = 4*pi*area/perimeter^2; %Not the ID metric for up vs down, for determination of circularness.
68 % display the results
69 metric_string = sprintf('%2.2f', metric); %Shows the circularness metric.
70 k: %k
71 centroidk = stats(k).Centroid; %finds the centroid of k
72 k_string = sprintf('%2.0f',k); %prints the value of k
73
74 if metric > threshold %If metric > threshold (particles are circular enough), find RGB values
75 z=z+1;
76 P = impixel(Pic1, centroidk(1), centroidk(2)); %Finds the RGB values of each particle spot.
77 j=8; %j sets how large an area will be summed in the next for loop.
78 z_string = sprintf('%2.0f',z); %Prints z
79 for i=1:j %This is the next for loop, where we use j. i runs from 1 to j
80 k: %we use k too. dummy for now.
81 i: %this is what we're stepping. Here for trouble shooting purposes.
82 numU; %number of tip-up
83 numD; %number of tip-down
84 Pa = impixel(Pic1, (centroidk(1)+i), (centroidk(2)+i)); %We sum RGB values in 4 quadrants, a,b,c,d.
85 Pb = impixel(Pic1, (centroidk(1)+i), (centroidk(2)-i)); %For each quadrant we're summing RGB
86 Pc = impixel(Pic1, (centroidk(1)-i), (centroidk(2)+i)); %We sum RGB from one outside the centroid to i
87 Pd = impixel(Pic1, (centroidk(1)-i), (centroidk(2)-i));
88 P=(Pa+Pb+Pc+Pd)/4; %Averages RGB for 4 quadrants
89 Pavg=P1+P; %running average of RGB. P1 defined at beginning.
90 P1=Pavg; %Sets P1 to the running average. For the first execution P1=P. For second, P1=P1+P.
91 end
92 centroid = stats(k).Centroid; %Finds the centroid.
93 P=Pavg; %Sets P to Pavg.
94 P=P/(j); %Sets P to P divided by j, the number of pixels summed outside the centroid.
95
96 %Part 4. Part 4 code begins within the loops for part 3, after part 4 terminates the loops for part 3 end.
97 UDMetric=(P(1)/P(2)); %This is metric designed to automate particle identification (R/G)
98
99 red_string = sprintf('%2.2f', (P(1))); %This line pulls out the red value from the P string.
100 green_string = sprintf('%2.2f', (P(2))); %This line pulls out the green value from the P string.
101 blue_string = sprintf('%2.2f', (P(3))); %This line pulls out the blue value from the P string.
102 METRIC_string = sprintf('%2.2f', (P(1)/P(2))); %This line pulls the values needed to compute the metric.
103 text(boundary(1,2)+5,boundary(1,1)+10,red_string,'Color','r',...
104 'FontSize',8,'FontWeight','bold'); %Prints the value of the red.
105 text(boundary(1,2)+5,boundary(1,1)-0,green_string,'Color','g',...
106 'FontSize',8,'FontWeight','bold'); %Prints the value of the green.
107 text(boundary(1,2)+5,boundary(1,1)-10,blue_string,'Color','b',...
108 'FontSize',8,'FontWeight','bold'); %Prints the value of the blue.
109 text(boundary(1,2)+15,boundary(1,1)+10,METRIC_string,'Color','y',...
110 'FontSize',8,'FontWeight','bold'); %Prints the value of the metric.
111 if UDMetric > 3.2 %This line sets the value that determines U from D.
112 text(boundary(1,2)+15,boundary(1,1)-20,'U','Color','c',... %This line prints U for tip-up.
113 'FontSize',6,'FontWeight','bold');
114 numU=numU+1; %This line keeps track of the number of tip-up pyramids
115 end
116
117 if UDMetric <= 3.2
118 text(boundary(1,2)+15,boundary(1,1)-20,'D','Color','w',... %This line prints D for tip-down.
119 'FontSize',6,'FontWeight','bold');
120 numD=numD+1; %This line keeps track of the number of tip-down pyramids
121 end
122
123 centroidk(1);
124 all = cat(3 ,all, [P]);
125 P1=[0 0 0];
126 Pavg=[0 0 0];
127
128 end
129
130 end
131

```

```

131
132 %Part 5 - the code makes histograms
133 - blue= all(1,3,(2:z+1)); %pulls out the blue
134 - green= all(1,2,(2:z+1)); %pulls out the green
135 - red= all(1,1,(2:z+1)); %pulls out the red
136 - B=squeeze(blue); %squeezes the blue into one number (not an array anymore)
137 - R=squeeze(red); %squeezes the red into one number (not an array anymore)
138 - G=squeeze(green); %squeezes the green into one number (not an array anymore)
139
140
141 - GR=R+G+B; %sum of red, green, blue
142 - RdGinf=R./(G); %R/G
143
144 - RdGfin= isfinite (RdGinf) ;
145 - RdG= RdGinf.*RdGfin;
146 %above 2 correct for infinite values (G=0)
147 - Gnorminf=G./(R+G+B);
148
149 - Gnormfin= isfinite (Gnorminf) ;
150 - Gnorm= Gnorminf.*Gnormfin;
151 %above 2 correct for inf
152 - Rnorminf=(R./G);
153
154 - histsize=50; %sets bin size in histogram.
155
156 - Rfin= isfinite (Rnorminf) ;
157 - UDMETRIC= Rnorminf.*Rfin; %computes the metric.
158
159
160
161 - figure %Makes the histogram of blue values.
162 - drawnow
163 - shading interp
164 - hold on
165 - hist(B,histsize);
166 - h = findobj(gca,'Type','patch');
167 - set(h,'FaceColor','b','EdgeColor','w')
168 - ylabel('Number of Pyramids','fontsize',12,'fontweight','b')
169 - xlabel('Blue Intensity from 0 to 255','fontsize',12,'fontweight','b')
170
171 - figure %Makes the histogram of red values.
172 - drawnow
173 - shading interp
174 - hold on
175 - hist(R,histsize);
176 - h = findobj(gca,'Type','patch');
177 - set(h,'FaceColor','r','EdgeColor','w')
178 - ylabel('Number of Pyramids','fontsize',12,'fontweight','b')
179 - xlabel('Red Intensity from 0 to 255','fontsize',12,'fontweight','b')
180
181 - figure %Makes the histogram of green values.
182 - drawnow
183 - shading interp
184 - hold on
185 - hist(G,histsize);
186 - h = findobj(gca,'Type','patch');
187 - set(h,'FaceColor','g','EdgeColor','w')
188 - ylabel('Number of Pyramids','fontsize',12,'fontweight','b')
189 - xlabel('Green Intensity from 0 to 255','fontsize',12,'fontweight','b')
190
191 - figure %Makes the histogram the metric values.
192 - drawnow
193 - shading interp
194 - hold on
195 - hist(UDMETRIC,histsize);
196 - h = findobj(gca,'Type','patch');
197 - set(h,'FaceColor','k','EdgeColor','w')
198 - ylabel('Number of Pyramids','fontsize',12,'fontweight','b')
199 - xlabel('Metric','fontsize',12,'fontweight','b')

```

Figure S1. MATLAB Code for Extracting RGB data.

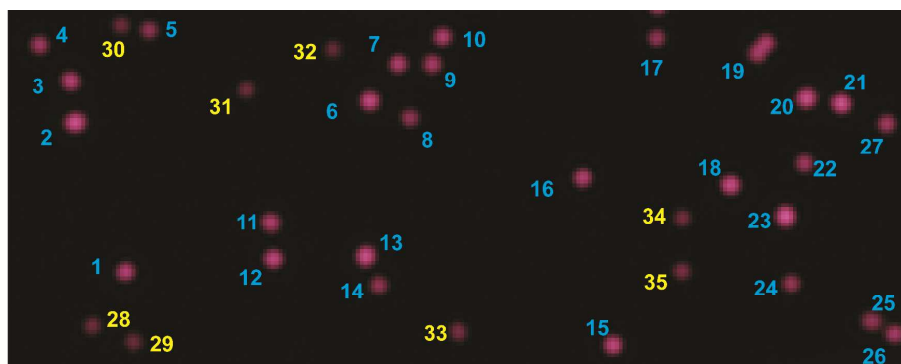

| Pyramid* | VIS          |               |               |               | NIR         |              |               |              | NIR + BP (850 nm) |              |               |              |
|----------|--------------|---------------|---------------|---------------|-------------|--------------|---------------|--------------|-------------------|--------------|---------------|--------------|
|          | Blue         | Green         | Red           | R/G           | Blue        | Green        | Red           | R/G          | Blue              | Green        | Red           | R/G          |
| 1        | 16.66        | 95.28         | 164.13        | 1.722         | 10.41       | 42.31        | 168.53        | 3.983        | 110.13            | 64.16        | 159.97        | 2.493        |
| 2        | 23.44        | 114.81        | 185.59        | 1.6165        | 16.88       | 53.44        | 199.09        | 3.725        | 138.72            | 84.91        | 189.38        | 2.230        |
| 3        | 27.28        | 121.56        | 192.50        | 1.5836        | 12.00       | 44.00        | 172.44        | 3.919        | 112.91            | 65.56        | 162.38        | 2.477        |
| 4        | 24.13        | 119.91        | 183.84        | 1.5331        | 8.47        | 31.81        | 147.50        | 4.637        | 90.75             | 51.25        | 135.50        | 2.644        |
| 5        | 15.50        | 80.22         | 162.25        | 2.023         | 7.31        | 29.63        | 134.84        | 4.551        | 86.19             | 46.34        | 137.31        | 2.963        |
| 6        | 60.56        | 147.44        | 201.03        | 1.3635        | 10.94       | 41.34        | 200.00        | 4.838        | 125.94            | 75.16        | 177.19        | 2.358        |
| 7        | 4.31         | 76.06         | 153.78        | 2.022         | 8.03        | 33.75        | 154.78        | 4.586        | 106.84            | 60.38        | 157.69        | 2.612        |
| 8        | 15.66        | 88.81         | 162.75        | 1.833         | 7.91        | 33.91        | 148.09        | 4.367        | 87.94             | 47.25        | 138.34        | 2.928        |
| 9        | 40.59        | 127.63        | 196.28        | 1.5379        | 9.47        | 41.78        | 195.72        | 4.685        | 103.91            | 56.41        | 155.44        | 2.756        |
| 10       | 8.34         | 76.47         | 155.56        | 2.034         | 9.63        | 35.44        | 161.75        | 4.564        | 107.78            | 61.97        | 158.69        | 2.561        |
| 11       | 19.16        | 108.16        | 203.25        | 1.8792        | 14.53       | 52.72        | 187.81        | 3.562        | 111.00            | 63.63        | 161.69        | 2.541        |
| 12       | 23.50        | 115.13        | 187.16        | 1.6256        | 13.38       | 44.41        | 170.06        | 3.829        | 116.44            | 68.34        | 166.78        | 2.440        |
| 13       | 36.22        | 135.56        | 200.94        | 1.4823        | 14.88       | 55.72        | 205.38        | 3.686        | 131.75            | 79.81        | 183.06        | 2.294        |
| 14       | 24.16        | 73.16         | 172.66        | 2.360         | 8.19        | 28.38        | 123.81        | 4.363        | 90.28             | 48.78        | 140.81        | 2.887        |
| 15       | 37.41        | 98.38         | 184.09        | 1.871         | 10.44       | 40.56        | 167.34        | 4.126        | 118.94            | 70.91        | 168.88        | 2.382        |
| 16       | 34.56        | 86.63         | 170.19        | 1.965         | 10.28       | 37.81        | 153.69        | 4.065        | 106.53            | 60.78        | 154.66        | 2.545        |
| 17       | 23.72        | 81.56         | 156.16        | 1.915         | 6.78        | 28.66        | 134.34        | 4.687        | 85.88             | 44.72        | 133.91        | 2.994        |
| 18       | 34.09        | 116.16        | 184.50        | 1.5883        | 12.16       | 44.44        | 171.75        | 3.865        | 122.88            | 73.59        | 173.63        | 2.359        |
| 19       | 59.91        | 146.31        | 205.84        | 1.4069        | 15.91       | 55.63        | 195.19        | 3.509        | 134.00            | 77.84        | 184.38        | 2.369        |
| 20       | 25.5         | 100.25        | 182.34        | 1.8189        | 13.81       | 52.63        | 185.16        | 3.518        | 131.47            | 78.78        | 184.25        | 2.339        |
| 21       | 41.97        | 116.41        | 186.72        | 1.6040        | 8.47        | 32.13        | 144.84        | 4.509        | 132.22            | 80.91        | 183.56        | 2.269        |
| 22       | 28.56        | 105.66        | 173.66        | 1.6436        | 8.22        | 40.09        | 179.88        | 4.487        | 94.28             | 51.16        | 144.91        | 2.832        |
| 23       | 39.53        | 128.81        | 202.41        | 1.5714        | 13.69       | 49.91        | 200.31        | 4.013        | 140.59            | 88.72        | 192.44        | 2.169        |
| 24       | 37.47        | 75.97         | 158.66        | 2.089         | 7.81        | 31.41        | 133.63        | 4.254        | 89.84             | 48.38        | 138.84        | 2.870        |
| 25       | 38.94        | 105.06        | 173.97        | 1.6559        | 5.34        | 25.75        | 150.31        | 5.837        | 101.13            | 53.38        | 154.38        | 2.892        |
| 26       | 16.34        | 74.56         | 149.06        | 1.999         | 8.25        | 35.34        | 163.13        | 4.616        | 108.03            | 59.63        | 160.53        | 2.692        |
| 27       | 18.84        | 84.63         | 162.50        | 1.920         | 7.09        | 40.53        | 177.72        | 4.385        | 96.66             | 52.97        | 146.66        | 2.769        |
| 28       | <b>15.00</b> | <b>99.19</b>  | <b>181.28</b> | <b>1.828</b>  | <b>7.38</b> | <b>39.47</b> | <b>169.63</b> | <b>4.289</b> | <b>68.34</b>      | <b>34.72</b> | <b>119.33</b> | <b>3.437</b> |
| 29       | <b>34.41</b> | <b>118.31</b> | <b>183.50</b> | <b>1.5510</b> | <b>7.00</b> | <b>35.28</b> | <b>163.09</b> | <b>4.623</b> | <b>66.28</b>      | <b>33.84</b> | <b>116.81</b> | <b>3.452</b> |
| 30       | <b>25.51</b> | <b>119.59</b> | <b>183.47</b> | <b>1.5342</b> | <b>6.38</b> | <b>32.09</b> | <b>143.03</b> | <b>4.457</b> | <b>68.44</b>      | <b>35.25</b> | <b>119.81</b> | <b>3.399</b> |
| 31       | <b>13.22</b> | <b>96.13</b>  | <b>174.97</b> | <b>1.820</b>  | <b>5.56</b> | <b>31.44</b> | <b>146.03</b> | <b>4.645</b> | <b>65.25</b>      | <b>33.56</b> | <b>112.59</b> | <b>3.355</b> |
| 32       | <b>33.19</b> | <b>116.59</b> | <b>189.97</b> | <b>1.629</b>  | <b>6.44</b> | <b>34.16</b> | <b>156.72</b> | <b>4.588</b> | <b>61.28</b>      | <b>31.31</b> | <b>110.06</b> | <b>3.515</b> |
| 33       | <b>44.34</b> | <b>130.59</b> | <b>186.81</b> | <b>1.4305</b> | <b>7.00</b> | <b>36.00</b> | <b>153.31</b> | <b>4.259</b> | <b>72.25</b>      | <b>37.53</b> | <b>121.09</b> | <b>3.226</b> |
| 34       | <b>49.00</b> | <b>129.06</b> | <b>193.44</b> | <b>1.4988</b> | <b>6.34</b> | <b>37.84</b> | <b>173.16</b> | <b>4.576</b> | <b>69.94</b>      | <b>35.47</b> | <b>118.38</b> | <b>3.337</b> |
| 35       | <b>43.91</b> | <b>121.63</b> | <b>190.88</b> | <b>1.5693</b> | <b>7.47</b> | <b>41.53</b> | <b>181.97</b> | <b>4.382</b> | <b>73.22</b>      | <b>36.91</b> | <b>124.44</b> | <b>3.371</b> |

\* Tip-up (U) particles indicated in bolded italics.

**Figure S2. RGB and R/G ratio values used to determine the orientation for Au nanopyramids.**

RGB intensity values were extracted from NIRcam (BP = 850 nm). Particles are arranged in the table by orientation. The first twenty-seven particles were identified as D and the remaining eight as U (indicated in bolded italics). Particle 1, 11, 12, 28, and 29 were used to calibrate the program to identify orientation and were examined in detail in Figure 3.

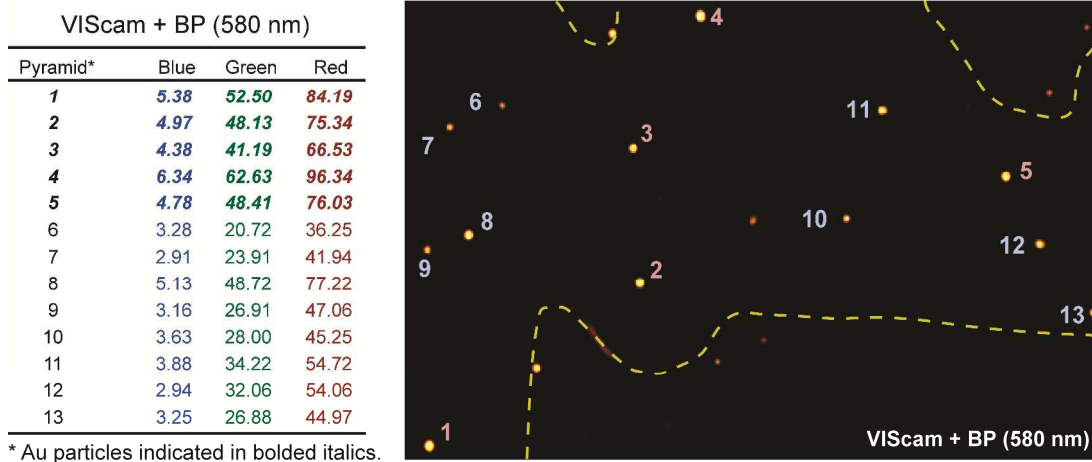

**Figure S3. RGB channel intensities used to determine composition for Au and Au/Ag/Au nanopyrramids.** Intensity for the RGB values were extracted from VIScam (BP = 580 nm). Particles are arranged in the table by orientation. The first five particles were identified in SEM as Au (indicated in bolded italics) and the remaining particles were identified as Au/Ag/Au.

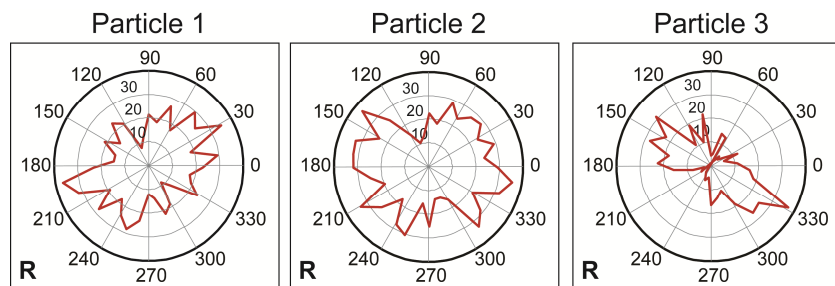

**Figure S4. Polar plots of R-channel with NIRcam (no BP) for the three AuNSs.** All images for polar plots were measured every  $10^\circ$  from  $0^\circ$  to  $360^\circ$  with an integration time of 30 s using the NIRcam and a polarizer. The orientations of the lobes are similar to those in Figure 5 but are less distinct because of contributions from other resonances.



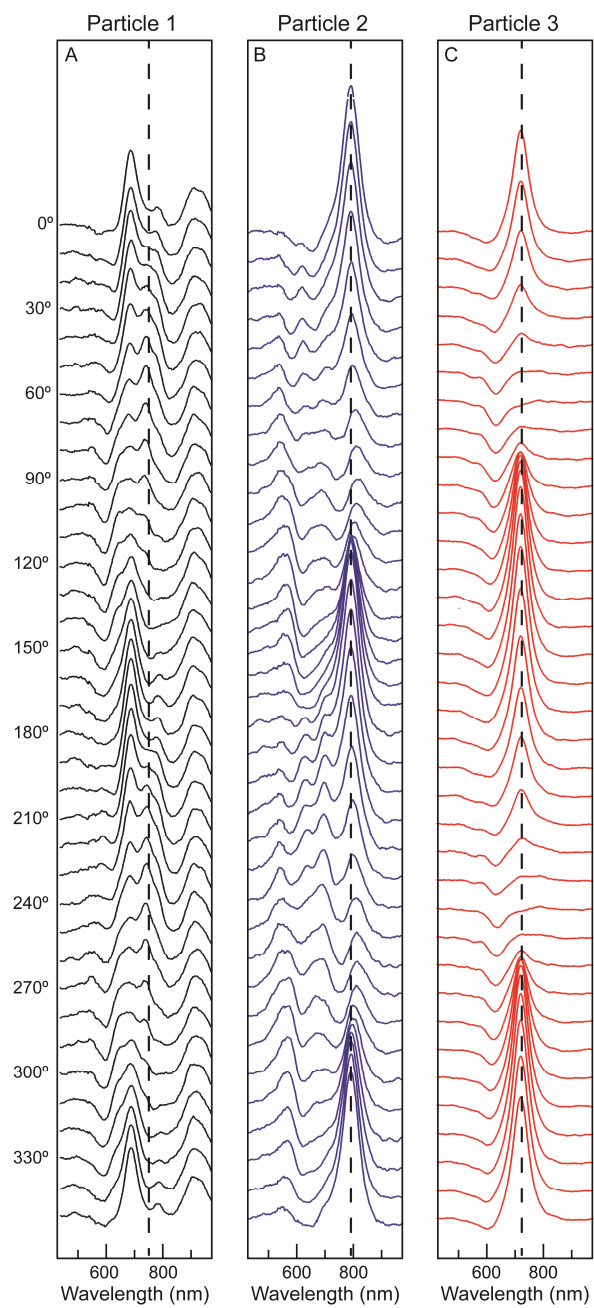

**Figure S5. Polarization-dependent single-particle spectroscopy for Au NSs in Figure 5.** Spectra were taken every 10° from 0° to 360°. Resonances corresponding to the longest arms are highlighted with a dashed line.

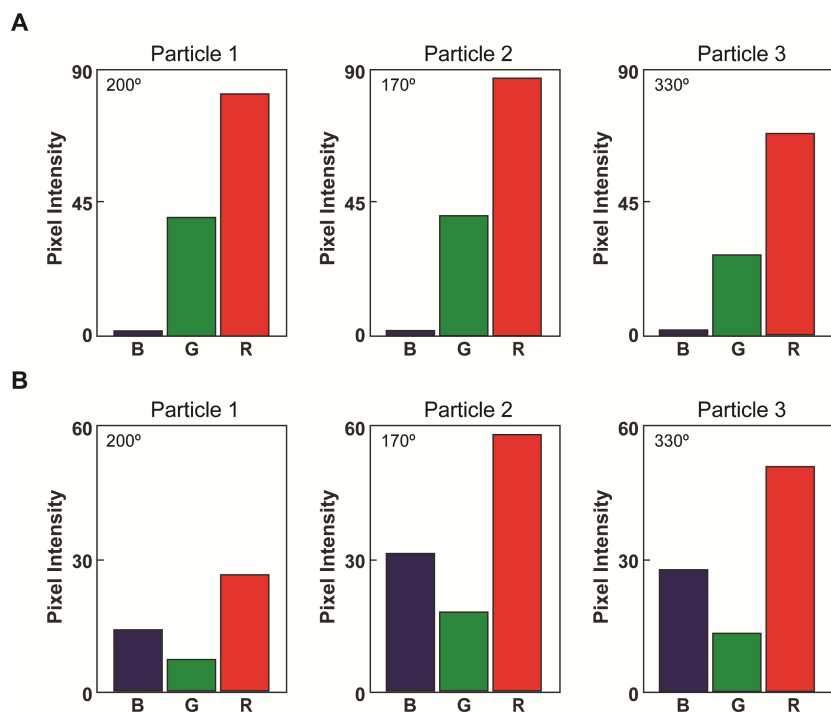

**Figure S6. RGB histograms for AuNSs at maximum LSP intensity.** Histograms of the RGB values for: **(A)** VIScam and **(B)** NIRcam (BP = 850 nm) of the three AuNSs. The intensity values were extracted from images at the polarization angle indicated and which corresponded to the orientation of the longest arms of each AuNS. The histograms demonstrate that contributions from other resonances, which can be attributed to different asperities, are present in the shorter wavelength regimes (G channels) in the VIScam data but are reduced by the addition of the BP filter.
